# Supplementary material for: Molecular Analysis of Caprine Enterovirus Circulating in China during 2016–2021: Evolutionary Significance
Source: MDPI journal article supplement (doi:10.3390/v14051051), 2022-05-15
Supplement: s1 [file s1]

[illegible]

Blue: the p-distance between JL-LS34, JL-LS127 and JL-LS165; Orange: the p-distance between NX-DR26 and SD-S68
