# Supplementary material for: Molecular Analysis of Caprine Enterovirus Circulating in China during 2016–2021: Evolutionary Significance
Source: MDPI journal article supplement (doi:10.3390/v14051051), 2022-05-15
Supplement: s1 [file s1]

**Table S2** Reference strains for enterovirus

| Strains                | Sequence | Accession No | Species | Host                  |
|------------------------|----------|--------------|---------|-----------------------|
| 990/UK-NI              | Complete | MG958646.1   | G       | sheep                 |
| Beijing-R0132          | Complete | KP240936.1   | D       | Homo sapiens          |
| BEV-261                | Complete | NC_021220.1  | F       | Bovine                |
| CEV-JL14               | Complete | NC_034267.1  | G       | Capra hircus          |
| EV7-15936-01           | Complete | AY896765.1   | B       | sewage                |
| EV30-8477-98           | Complete | AY896767.1   | B       | Human with meningitis |
| HY12                   | Complete | KF748290.1   | E       | Bovine                |
| K2577                  | Complete | AF123432.1   | E       | Bovine                |
| N203                   | Complete | AF414373.2   | J       | simian                |
| swine/K23/2008/HUN     | Complete | HQ702854.1   | G       | Sus scrofa            |
| PEV-B-KOR              | Complete | JQ818253.1   | G       | Pig                   |
| S0098b/CA16/2013/CHN   | Complete | KM402020.1   | A       | Homo sapiens          |
| S0102b/EV71/2013/CHN   | Complete | KM402021.1   | A       | Homo sapiens          |
| Sev-nj1                | Complete | KT581587.1   | J       | primate               |
| TB4-OEV                | Complete | JQ277724.1   | G       | Ovis aries            |
| US/KY/14-18953         | Complete | KM851231.1   | D       | Homo sapiens          |
| V2-Tol.1               | Complete | HQ738303.1   | C       | Homo sapiens          |
| V3-Tul.7               | Complete | HQ738302.1   | C       | Homo sapiens          |
| wild boar/WBD/2011/HUN | Complete | JN807387.1   | G       | wild boar             |
| SD-S67                 | Complete | MK639928.1   | F       | goat                  |
| UKG/410/73             | Complete | NC_004441.1  | G       | Pig                   |
| LP 54                  | Complete | AF363455.1   | G       | Pig                   |
| PoEnV-BEL-12R021       | Complete | KP982873.1   | G       | Sus scrofa            |
| EVG 08/NC              | VP1      | KY761948.1   | G       | Sus scrofa domesticus |
| 714418                 | VP1      | KT265911.2   | G       | Pig                   |
| 734087                 | VP1      | KT265961.2   | G       | Pig                   |
| 744257                 | VP1      | KJ156451.1   | G       | Pig                   |
| 714222                 | VP1      | KT265900.1   | G       | Pig                   |
| 714270                 | VP1      | KT265903.1   | G       | Pig                   |
| 714405                 | VP1      | KT265909.1   | G       | Pig                   |

|                           |          |             |              |                       |
|---------------------------|----------|-------------|--------------|-----------------------|
| 724307                    | VP1      | KT265941.1  | G            | Pig                   |
| GER/F26-2                 | VP1      | MF113370.1  | G            | Sus scrofa domesticus |
| 1715 UWB                  | Complete | NC_038309.1 | H            | Simian                |
| 19CC                      | Complete | NC_038310.1 | I            | Dromedary             |
| rodent/Mc/PicoV/Tibet2015 | Complete | KX156159.1  | K            | Rodent                |
| SEV-gx                    | Complete | NC_029905.1 | L            | Macaca mulatta        |
| ATCC VR-1559              | Complete | NC_038311.1 | Rhinovirus A | Human                 |
| ATCC VR-485               | Complete | FJ445112.1  | Rhinovirus B | Human                 |
| HRV-QPM                   | Complete | EF186077.2  | Rhinovirus C | Human                 |
| rodent/Ee/PicoV/NX2015    | Complete | NC_038989.1 | K            | rodent                |
| GER/F8-2                  | VP1      | MF113372.1  | G            | Sus scrofa domesticus |

---
