# Supplementary material for: Molecular Analysis of Caprine Enterovirus Circulating in China during 2016–2021: Evolutionary Significance
Source: MDPI journal article supplement (doi:10.3390/v14051051), 2022-05-15
Supplement: s1 [file s1]

**Table S4** The complete genome sequence of the newly identified virus strains

| Strains  | Complete genome (bp) | 5'UTR (bp) | ORF (bp) | 3'UTR (bp) | Accession No |
|----------|----------------------|------------|----------|------------|--------------|
| JL-LS34  | 7447                 | 821        | 6519     | 107        | MN598033     |
| JL-LS127 | 7467                 | 820        | 6519     | 128        | MN598034     |
| JL-LS165 | 7454                 | 820        | 6519     | 115        | MN598035     |
| JL-LS174 | 7453                 | 822        | 6519     | 112        | MN598036     |
| SD-S68   | 7465                 | 821        | 6516     | 128        | MN598040     |
| NMG-F37  | 7469                 | 819        | 6513     | 137        | MN598041     |
| NX-DR26  | 7463                 | 820        | 6516     | 127        | MN598038     |
