# Supplementary material for: Molecular Analysis of Caprine Enterovirus Circulating in China during 2016–2021: Evolutionary Significance
Source: MDPI journal article supplement (doi:10.3390/v14051051), 2022-05-15
Supplement: s1 [file s1]

**Table S1** Primer sequences to amplify full-length sequences

| Name    | Sequences                | Position    |
|---------|--------------------------|-------------|
| CEV-1-F | ACGTGGCGGTAGTGCTTTGGTTTG | 41 ~ 64     |
| CEV-1-R | GCTTGGGTGGCGAGGTGTCTGTT  | 3393 ~ 3415 |
| CEV-2-F | GTGGTAGCTCTGAGTGAT       | 385 ~ 402   |
| CEV-2-R | TCGTTGCTTATTCTTGAAC      | 4423 ~ 4442 |
| CEV-3-F | GTGGTAGCTCTGAGTGAT       | 385 ~ 402   |
| CEV-3-R | GGATTTGCAATAATAGAC       | 3516 ~ 3533 |
| CEV-4-F | GCGCGGTGGCACAGTTAGG      | 3160 ~ 3178 |
| CEV-4-R | CACGCCCGACTGGAACTGAGC    | 7264 ~ 7284 |
| CEV-5-F | GGTTACATACAGTTCAAGAA     | 3413 ~ 3432 |
| CEV-5-R | ATAACCGGATGTATGAGGA      | 7111 ~ 7129 |
| CEV-6-F | TTTAAAACAGCCTGGGGGTTGT   | 1 ~ 22      |
| CEV-6-R | TAGGCGCTTCTCTAGTTAC      | 489 ~ 507   |
