# Supplementary material for: Molecular Analysis of Caprine Enterovirus Circulating in China during 2016–2021: Evolutionary Significance
Source: MDPI journal article supplement (doi:10.3390/v14051051), 2022-05-15
Supplement: s1 [file s1]

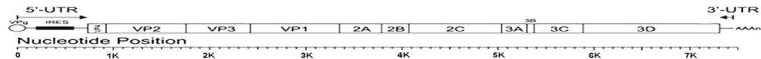

SimPlot - Query: NMG-F37

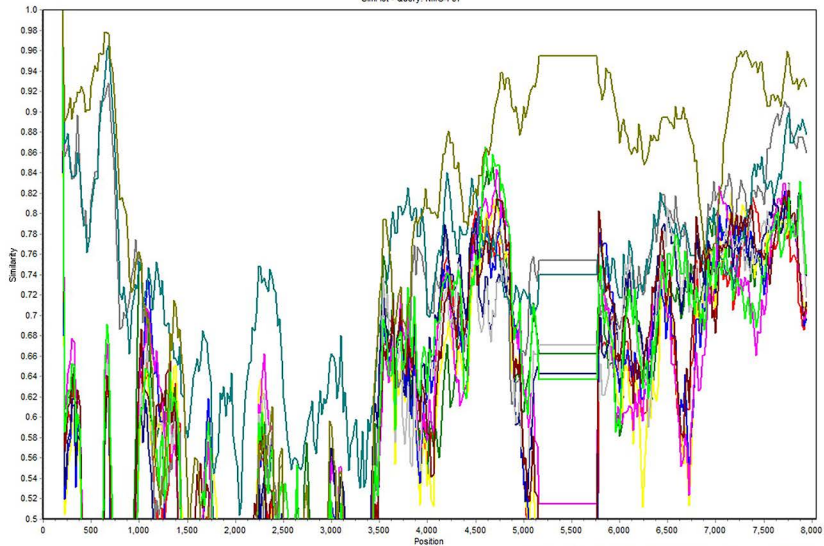

- EV-G1-UKG-410-73
- EV-G2-LP\_54
- EV-G3-swine-K23-2008-HUN
- EV-G4-wild\_boar-WBD-2011-HUN
- EV-G5-TB4-OEV
- EV-G6-PEV-B-KOR
- EV-G7-990\_UK-HI
- EV-G8-714418\_CaoLanh\_VN\_2012-02-21
- EV-G9-734087\_ThanhBinh\_VN\_2012-03-20
- EV-G10-PoEnV-BEL-12R021
- EV-G17-EVG\_08-NC\_USA-2015
- EV-G20-CEV-JL14
