# Supplementary material for: Molecular Analysis of Caprine Enterovirus Circulating in China during 2016–2021: Evolutionary Significance
Source: MDPI journal article supplement (doi:10.3390/v14051051), 2022-05-15
Supplement: s1 [file s1]

**Table S3** Basic information for the caprine/ovine enterovirus isolates

| Isolate name | Origin         | Isolation Year | Host  | Isolation source | Clinical signs  | Available sequence | TCID <sub>50</sub> /0.1mL |
|--------------|----------------|----------------|-------|------------------|-----------------|--------------------|---------------------------|
| JL-LS34      | Jilin          | 2017           | Goat  | feces            | Severe diarrhea | Complete genome    | 10 <sup>6.5</sup>         |
| JL-LS127     | Jilin          | 2017           | Goat  | feces            | Severe diarrhea | Complete genome    | 10 <sup>6.33</sup>        |
| JL-LS165     | Jilin          | 2017           | Goat  | feces            | Severe diarrhea | Complete genome    | 10 <sup>4.5</sup>         |
| JL-LS174     | Jilin          | 2017           | Goat  | feces            | Severe diarrhea | Complete genome    | 10 <sup>3</sup>           |
| SD-68        | Shandong       | 2018           | Goat  | feces            | soft feces      | Complete genome    | 10 <sup>6</sup>           |
| NMG-F37      | Inner Mongolia | 2016           | Goat  | feces            | soft feces      | Complete genome    | 10 <sup>4.23</sup>        |
| NX-DR26      | Ningxia        | 2018           | Sheep | feces            | soft feces      | Complete genome    | 10 <sup>3</sup>           |
| XJ-259       | Xinjiang       | 2021           | Sheep | feces            | soft feces      | 5'UTR              | 10 <sup>4.8</sup>         |
| XJ-274       | Xinjiang       | 2021           | Goat  | feces            | Severe diarrhea | 5'UTR              | 10 <sup>5</sup>           |
| XJ-287       | Xinjiang       | 2021           | Sheep | feces            | soft feces      | 5'UTR              | 10 <sup>5.5</sup>         |
| HeN-T3-12    | Henan          | 2019           | Goat  | feces            | soft feces      | 5'UTR              | 10 <sup>5.2</sup>         |
| HeN-D1-37    | Henan          | 2019           | Goat  | feces            | soft feces      | 5'UTR              | 10 <sup>3.8</sup>         |
| HeN-D2-57    | Henan          | 2019           | Goat  | feces            | soft feces      | 5'UTR              | 10 <sup>4.7</sup>         |
